# Supplementary material for: Synergistic Action of Mild Heat and Essential Oil Treatments on Culturability and Viability of Escherichia coli ATCC 25922 Tested In Vitro and in Fruit Juice
Source: MDPI journal article supplement (doi:10.3390/foods11111615), 2022-05-30
Supplement: s1 [file s1]

## Article

# Synergistic Action of Mild Heat and Essential Oil Treatments on Culturability and Viability of *Escherichia coli* ATCC 25922 Tested In Vitro and in Fruit Juice

Luciana Di Gregorio <sup>1,†</sup>, Alex Tchuenchieu <sup>2,3,\*</sup>, Valeria Poscente <sup>1,4,†</sup>, Stefania Arioli <sup>5</sup>, Antonella Del Fiore <sup>1</sup>, Manuela Costanzo <sup>1</sup>, Debora Giorgi <sup>1</sup>, Sergio Lucretti <sup>1</sup> and Annamaria Bevivino <sup>1,\*</sup>

<sup>1</sup> Department for Sustainability, Biotechnologies and Agroindustry Division, ENEA, Italian National Agency for New Technologies, Energy and Sustainable Economic Development, Casaccia Research Center, 00123 Rome, Italy; luciana.digregorio@enea.it (L.D.G.); valeria.poscente@unitus.it (V.P.); antonella.delfiore@enea.it (A.D.F.); manuela.costanzo@enea.it (M.C.); debora.giorgi@enea.it (D.G.); sergio.lucretti@enea.it (S.L.)

<sup>2</sup> Centre for Food and Nutrition Research, Institute of Medical Research and Medicinal Plants Studies (IMPM), Yaoundé P.O. Box 6163, Cameroon

<sup>3</sup> Food Evolution Research Laboratory, School of Tourism and Hospitality, College of Business and Economics, University of Johannesburg, Johannesburg 2000, South Africa

<sup>4</sup> Department of Agriculture and Forest Sciences, Università degli Studi della Tuscia, 01100 Viterbo, Italy

<sup>5</sup> Department of Food, Environmental and Nutritional Science, Università degli Studi di Milano, 20122 Milan, Italy; stefania.arioli@unimi.it

\* Correspondence: tkad01@yahoo.fr (A.T.); annamaria.bevivino@enea.it (A.B.); Tel.: +39-0630483868 (A.B.)

† These authors contributed equally to this work.

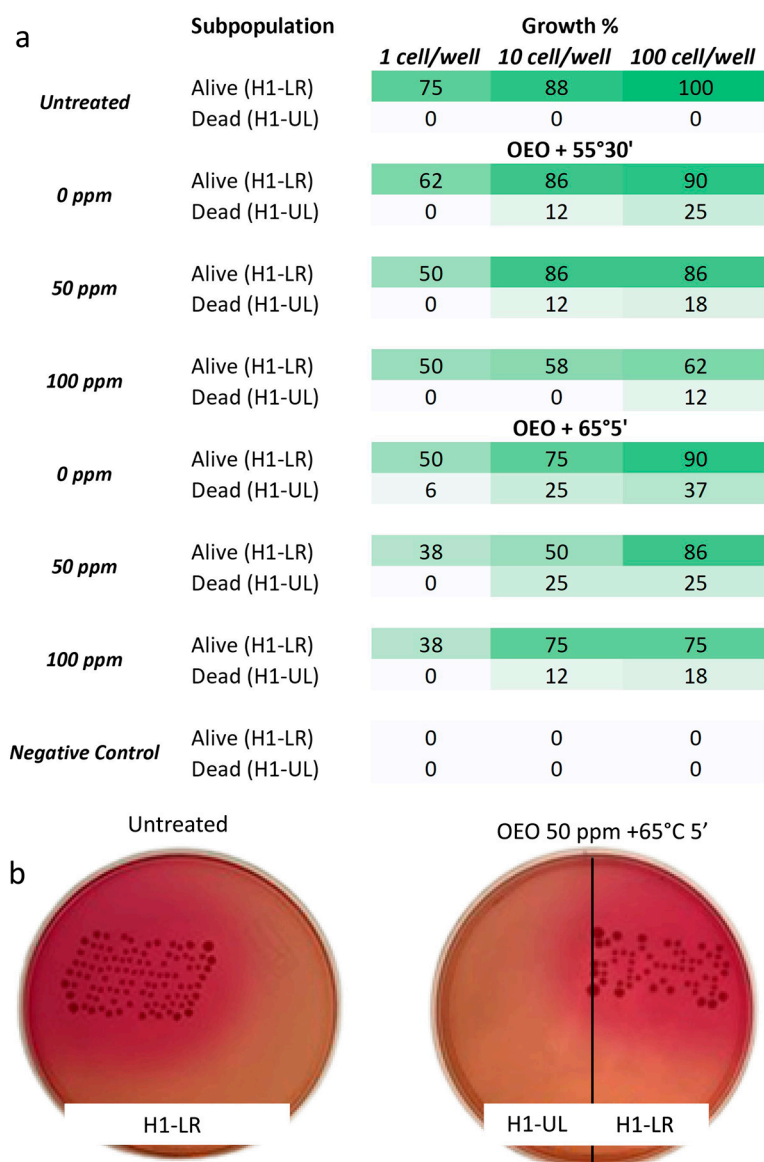

**Figure S1:** Flow Cell Sorting analysis of *E. coli* in different conditions and treatment. **(a)** Growth percentage expressed as cell density ( $OD_{600}$ ) referred to 1 cell, 10 or 100 cells spotted into 96-well plates under treatment conditions; **(b)** Example of bacterial cells recovered from untreated and treated samples and inoculated on MacConkey agar plates using a flow sorting matrix structure of 128 cells. H1-LR: intact cells/viable cells; H1-UL: permeabilized/dead cells. *E. coli* ATCC25922 and *E. coli* ATCC25922 autoclaved at 121 °C for 15 min spotted on MacConkey Agar were used as a positive (untreated) and negative controls, respectively.
